# Supplementary material
Source: publisher site journal article supplement (https://cdn.jamanetwork.com/ama/content_public/journal/jamanetworkopen/938243/zoi190615supp2_prod.pdf)

## Supplementary Online Content

Iyengar NM, Smyth LM, Lake D, et al. Efficacy and safety of gemcitabine with trastuzumab and pertuzumab after prior pertuzumab-based therapy among patients with human epidermal growth factor receptor 2–positive metastatic breast cancer: a phase 2 clinical trial. *JAMA Netw Open*. 2019;2(11):e1916211. doi:10.1001/jamanetworkopen.2019.16211

### **eFigure.** Study Flow Diagram

This supplementary material has been provided by the authors to give readers additional information about their work.

eFigure. Study Flow Diagram

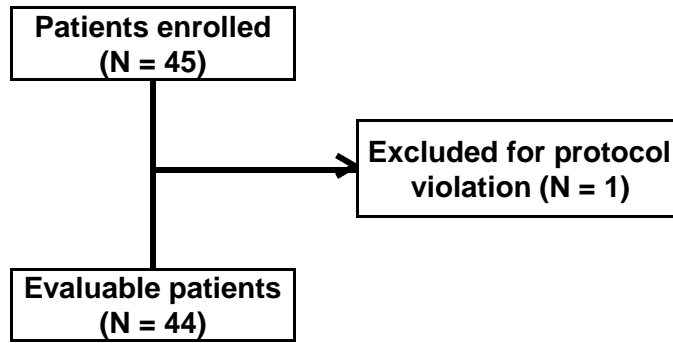

Supplement: Supplementary file [file zoi190615supp2_prod.pdf]
